# Supplementary material for: Adherence to the Mediterranean Diet in Association with Self-Perception of Diet Sustainability, Anthropometric and Sociodemographic Factors: A Cross-Sectional Study in Italian Adults
Source: MDPI journal article supplement (doi:10.3390/nu13093282), 2021-09-20
Supplement: s1 [file s1]

**Supplementary Table S1.** Percentage distribution of respondents according to their consumption frequency of single food groups/items.

| Food groups                             | Percentage of respondents (n= 838) |         |          |          |         |
|-----------------------------------------|------------------------------------|---------|----------|----------|---------|
|                                         | Never or seldom                    | <1/day  | 1/day    | 2/day    | ≥3/day  |
| Wholegrain pasta or rice                | 19.2                               | 42.2    | 33.4     | 4.1      | 1.1     |
| Vegetables, all types                   | 8.7                                | 26.8    | 33.3     | 28.0     | 3.1     |
| Fruit, all types fresh and fresh juices | 7.2                                | 25.4    | 26.1     | 32.5     | 8.8     |
| Milk and yoghurt                        | 19.9                               | 30.0    | 36.9     | 11.2     | 2.0     |
| Food groups                             | Percentage of respondents (n= 838) |         |          |          |         |
|                                         | Never or seldom                    | <1/day  | 1-2/day  | 3-4/day  | ≥5/day  |
| Wholegrain bread and substitutes        | 22.0                               | 33.1    | 39.9     | 4.4      | 0.7     |
| Olive oil to cook and to dress          | 4.2                                | 22.8    | 59.8     | 11.5     | 1.8     |
| Butter, margarine or cooking cream      | 58.4                               | 32.5    | 7.2      | 1.4      | 0.6     |
| Wine                                    | 48.3                               | 30.8    | 17.3     | 2.9      | 0.7     |
| Food groups                             | Percentage of respondents (n= 838) |         |          |          |         |
|                                         | Never or seldom                    | <1/week | 1-3/week | 4-6/week | ≥7/week |
| Red meat, meat products                 | 11.7                               | 27.7    | 51.2     | 8.1      | 1.3     |
| White meat                              | 9.1                                | 28.3    | 56.9     | 4.9      | 0.8     |
| Carbonated and/or SSB                   | 43.3                               | 27.8    | 21.5     | 4.5      | 2.9     |
| Sweets                                  | 23.5                               | 37.4    | 24.0     | 10.1     | 5.0     |
| Food groups                             | Percentage of respondents (n= 838) |         |          |          |         |
|                                         | Never or seldom                    | <1/week | 1/week   | 2-3/week | ≥4/week |
| Fish or seafood                         | 9.7                                | 28.9    | 28.8     | 30.2     | 2.5     |
| Nuts                                    | 30.2                               | 26.1    | 14.7     | 19.2     | 9.8     |
| Pulses                                  | 12.5                               | 30.4    | 28.6     | 25.7     | 2.7     |

Note: The categories of consumption frequencies are expressed as number of servings per day or week. SSB: sugar-sweetened beverages.
